# Supplementary material for: Spontaneously induced magnetic anisotropy in an ultrathin Co/MoS2 heterojunction
Source: Royal Society of Chemistry journal article supplement (doi:10.1039/d0nh00108b), 2020-01-01
Supplement: d0nh00108b1.pdf [file d0nh00108b1.pdf]

## **Spontaneously Induced Magnetic Anisotropy in an Ultrathin Co/MoS<sub>2</sub> Heterojunction**

Chun-I Lu,<sup>1,4</sup> Chih-Heng Huang,<sup>1,2</sup> Kui-Hon Ou yang,<sup>3</sup> Kristan Bryan Simbulan,<sup>4</sup> Kai-Shin Li,<sup>5</sup> Feng Li,<sup>6</sup> Junjie Qi,<sup>6</sup> Matteo Jugovac,<sup>7</sup> Iulia Cojocariu,<sup>7</sup> Vitaliy Feyer,<sup>7</sup> Christian Tusche,<sup>7</sup> Minn-Tsong Lin,<sup>8,9</sup> Tzu-Hung Chuang,<sup>1</sup> Yann-Wen Lan<sup>4†</sup> and Der-Hsin Wei<sup>1\*</sup>

<sup>1</sup>*Scientific Research Division, National Synchrotron Radiation Research Center, Hsinchu, Taiwan*

<sup>2</sup>*International Ph. D. Program for Science, National Sun Yat-Sen University Kaohsiung, Taiwan*

<sup>3</sup>*Graduate Institute of Applied Physics, National Taiwan University, Taipei, Taiwan*

<sup>4</sup>*Department of Physics, National Taiwan Normal University, Taipei, Taiwan*

<sup>5</sup>*National Nano Device Laboratories, National Applied Research Laboratories, Hsinchu, Taiwan*

<sup>6</sup>*State Key Laboratory for Advanced Metals and Materials, School of Materials Science and Engineering, University of Science and Technology Beijing, Beijing, People's Republic of China*

<sup>7</sup>*Forschungszentrum Jülich, Peter Grünberg Institut (PGI-6), 52425, Jülich, Germany*

<sup>8</sup>*Department of Physics, National Taiwan University, Taipei, Taiwan*

<sup>9</sup>*Institute of Atomic and Molecular Sciences, Academia Sinica, Taipei 10617, Taiwan*

†ywlan@ntnu.edu.tw

\*dhw@nsrrc.org.tw

## **Supplementary Information**

### **Co (3 ML) ultrathin films on MoS<sub>2</sub>**

In the main manuscript, we show a XMCD-PEEM image of Co films of thickness 5 ML and above. The reason not to discuss domain images from thinner Co layers is that there is no domain to discuss. For each magnetic order (ferro-, antiferro- and ferri-),

there is a constant competition with thermal fluctuation; not until that fluctuation is suppressed or overcome can we observe the magnetic order. For the Co/MoS<sub>2</sub> heterojunction discussed here, we find the critical thickness of the Co layer to overcome thermal fluctuation to lie between 3 and 5 ML (data given in a later section). For this reason, when taking XMCD images from the heterojunction with Co (3 ML) as displayed in Figure S1, the two images recorded with opposite photon helicity show no obvious contrast reversal. Although this argument applies to both Co/MoS<sub>2</sub> and Co/SiO<sub>2</sub>, we note that the Co becomes partially oxidized on SiO<sub>2</sub>, which could also contribute to an absence of ferromagnetic order at the parts of the image corresponding to Co/SiO<sub>2</sub> (Ref. [S1]).

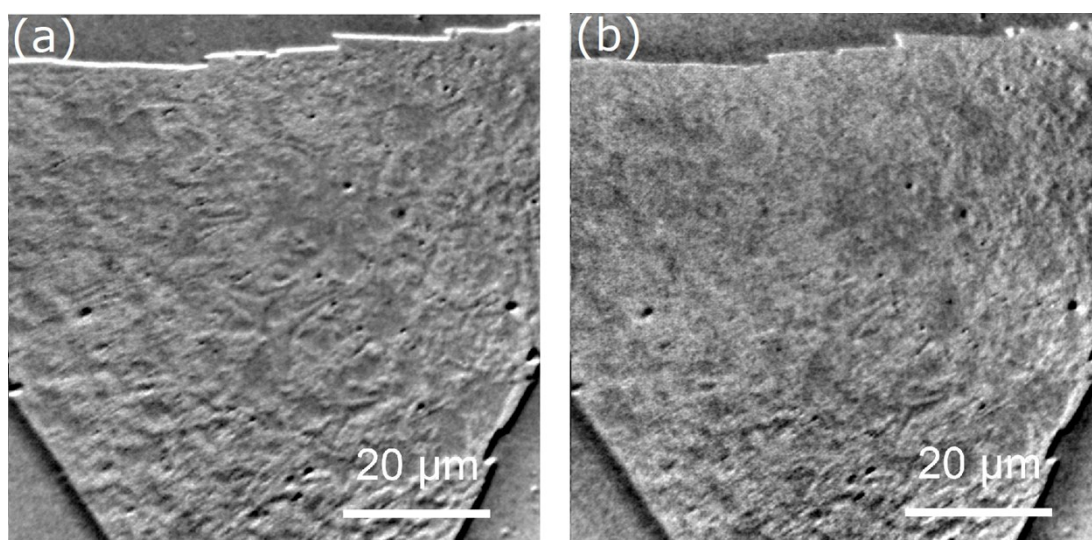

**Figure S1.** XMCD enhanced PEEM images acquired using (a) RCP light (Co  $L_3$  – Co  $L_2$ ) and (b) LCP light (Co  $L_3$  – Co  $L_2$ ), with no obvious contrast reversal between the two images.

### Co film morphology vs. magnetic domains

As the contrast of XMCD-PEEM image is proportional to the cosine of the angle between the photon beam polarization and the magnetization, a corrugated surface morphology could introduce an additional uncertainty in the image analysis. To examine a possible impact of the Co film morphology on the domain analysis, we deposited additional Co (2 ML) on top of the surface shown in Figure S1. In Figures S2 (a) and (b), we observed not only an additional contrast arisen but also a contrast reversal after flipping the photon polarization. This observation confirms that the

ferromagnetism of the Co layer became turned on. Figure S2(c) is the PEEM image recorded with the XMCD effect switched off; i.e., the image is recorded with linearly polarized photons at an energy far from the Co  $L$ -edge absorption resonance to avoid any contribution from absorption asymmetry. Comparing Figures S2(a) and S2(b) with S2(c), we find no correlation between the magnetic domain and the film morphology. A closer examination of the magnified images as displayed in Figure S3(a) and S3(b) yields the same conclusion.

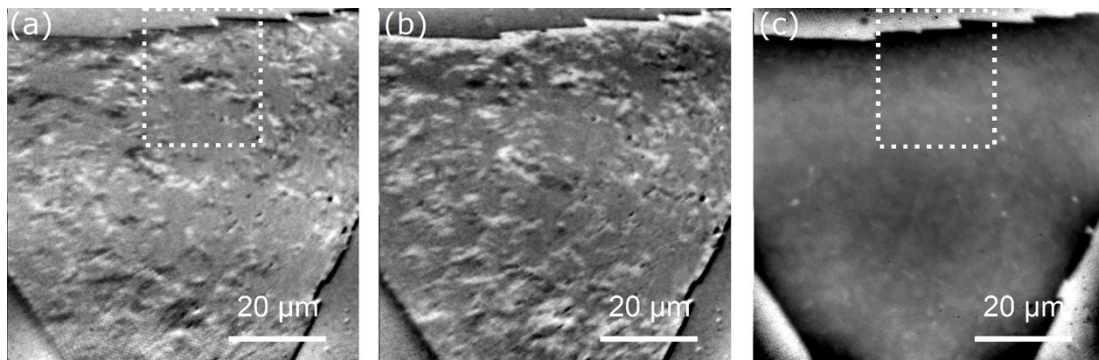

**Figure S2.** PEEM images acquired using (a) RCP light (Co  $L_3$ –Co  $L_2$ ), (b) LCP light (Co  $L_3$ –Co  $L_2$ ), and (c) Linearly polarized light with photon energy equal to 770 eV, an energy far from Co  $L$ -edge resonances.

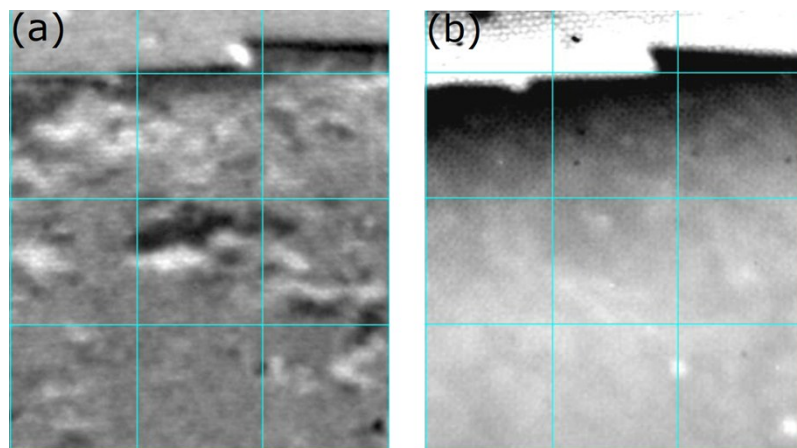

**Figure S3.** Magnified images taken from the squares marked with a white dashed line in (a) Figure S2(a) and (b) Figure S2(c).

### Preparation of the polycrystalline monolayer MoS<sub>2</sub>

In Figure 4 of the main text, we compare the domain structures of Co films, deposited on single grain  $\text{MoS}_2$  and on polycrystalline  $\text{MoS}_2$ . The polycrystalline monolayer  $\text{MoS}_2$  was prepared inside a tubular furnace according to the solid-source CVD method. The substrate used for the growth was  $\text{Al}_2\text{O}_3$ , which was heated via a two-step process. The first step was to set the temperature of the furnace to  $150\text{ }^\circ\text{C}$  for 10 min, then ramping the temperature to  $680\text{ }^\circ\text{C}$  with a linear ramp of slope, and keeping the temperature constant for 15 min. Argon served as carrier gas to bring S to react with  $\text{MoO}_3$  at  $680\text{ }^\circ\text{C}$ . The detailed process is described in Ref. [S1]. Figure S4 proves that the lattice structure is polycrystalline; the lattice parameter is consistent with the bulk variant.

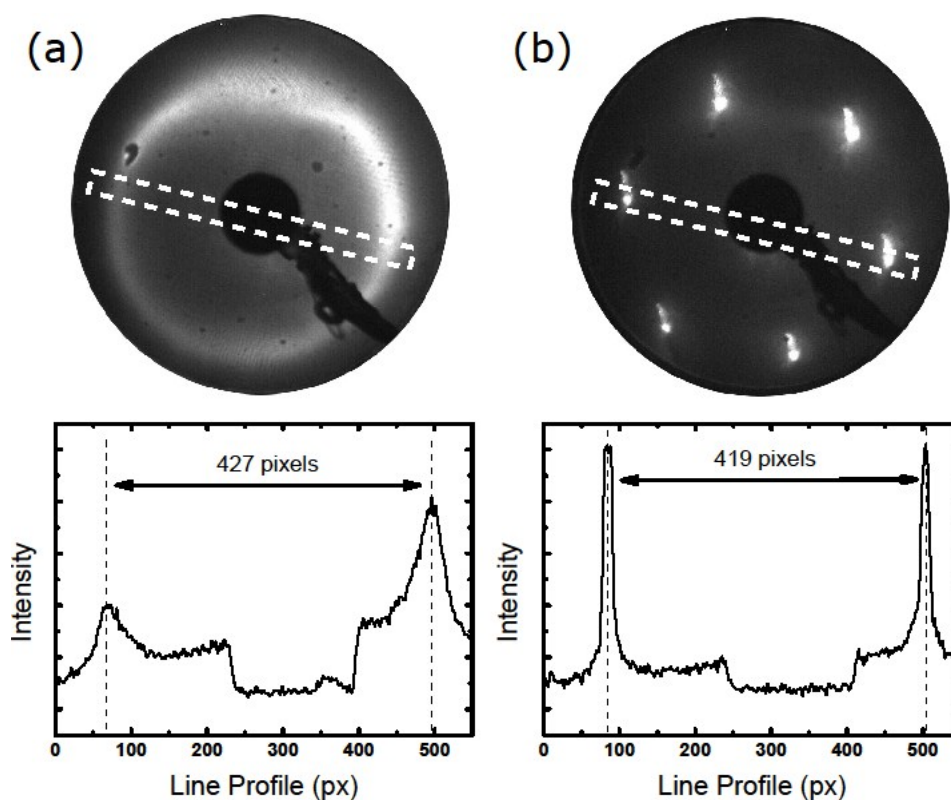

**Figure S4.** LEED patterns and the corresponding line profiles at electron energy 70 eV of (a) polycrystalline  $\text{MoS}_2$  and (b) bulk  $\text{MoS}_2$ . The white dashed-line areas indicate the integration areas for the line profiles.

### **Magneto-optical Kerr effect: Co magnetization in-plane**

By analyzing the histogram derived from the XMCD-PEEM image, we suggest that the magnetization of the Co layer in  $\text{Co}/\text{MoS}_2$  is in-plane. As the monolayer  $\text{MoS}_2$  flake

is too small and the bulk MoS<sub>2</sub> surface is too rough, neither sample was suitable for our measurement of the magneto-optical Kerr effect (MOKE), but polycrystalline MoS<sub>2</sub> can be prepared with a larger area and is known to be flat. Figure S5 depicts the result of a thickness-dependent MOKE measurement on Co (x ML)/MoS<sub>2</sub> (polycrystalline). The results shown in Figure S5 are consistent with the PEEM measurements, namely that the onset of ferromagnetic order in-plane occurs at Co (5 ML).

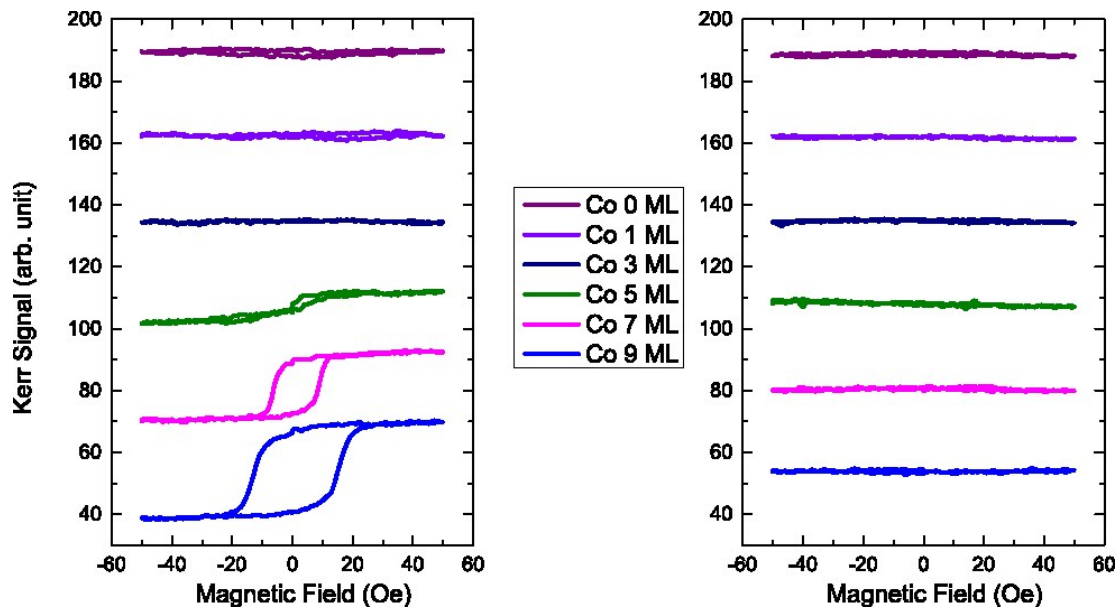

**Figure S5.** MOKE measurement of Co (x ML)/MoS<sub>2</sub> (polycrystalline), x = 0, 1, 3, 5, 7, 9. The plot at left shows the onset of in-plane ferromagnetic hysteresis when the Co layer attained 5 ML. No hysteresis was observed along the direction of the surface normal, as shown in the plot at right.

Regarding the control experiment of the MOKE hysteresis loops of Co(7 ML)/SiO<sub>2</sub>, we make the comparison between the loops taken from Ref. [S1] and the Figure S5 above. The two hysteresis loops have visible differences; the loop acquired from Co/MoS<sub>2</sub> has a lower squareness and an approximately 40% smaller magnitude in coercivity (10 Oe on Co/MoS<sub>2</sub>, 16 Oe on Co/SiO<sub>2</sub>). An additional observation here is that, while MOKE suggests that an external magnetic field can magnetize a 7ML thick of Co layer, the PEEM image depicted in Figure 3(b) indicates that Co (7 ML)/SiO<sub>2</sub> exhibits no spontaneous magnetic order in micrometer size.

### Mo 3d and S 2p $\mu$ -XPS

Figures S6(a) and (b) report the Mo 3d and S 2p  $\mu$ -XPS results. The shapes of both spectra are consistent with that of pristine MoS<sub>2</sub> reported in Ref. [29], but not with that of Co-doped MoS<sub>2</sub> ascribed in Ref. [40]. We hence suggest that the Co atoms do not break the Mo-S bonds but weakly hybridize with those topmost S atoms in the MoS<sub>2</sub> substrate.

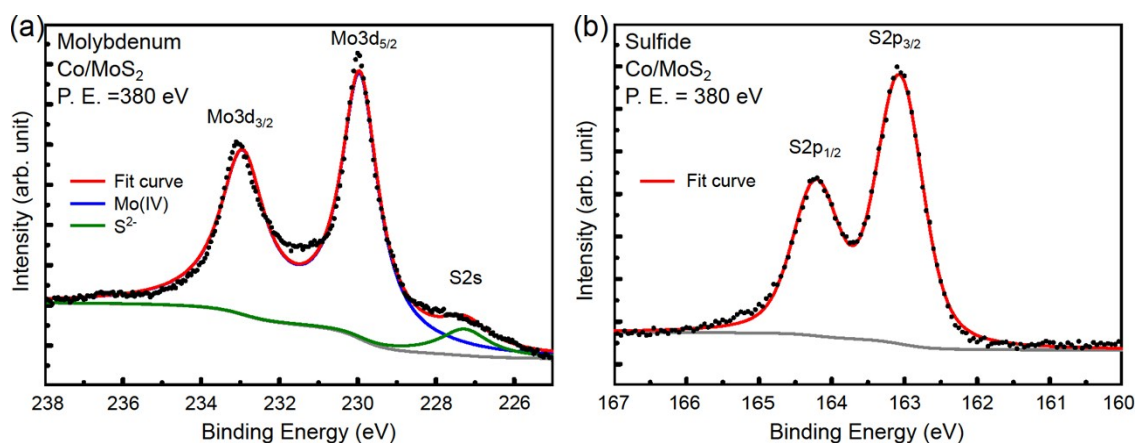

**Figure S6.**  $\mu$ -XPS of (a) Mo 3d and (b) S 2p core levels of a Co(4 ML)/MoS<sub>2</sub>.

## Lattice structure of Co

The growth mode of Co films on MoS<sub>2</sub> is a relevant issue to determine the origin of the magnetic anisotropy. We performed LEED measurements in a series on Co films grown on bulk MoS<sub>2</sub>. Figure S7(a) shows the LEED pattern of the bare surface of bulk single crystal MoS<sub>2</sub>. The sharpness of the LEED pattern and the absence of a diffuse background is an effective indication that the probed area was smaller than a single grain. Upon cobalt deposition (3 ML), the diffraction pattern became blurred (Figure S7(b)). The LEED pattern became even more diffuse when the Co deposition attained 5 ML (Figure S7(c)). This observation strongly implies that the Co adlayer was amorphous. We believe that Co deposited on a monolayer of triangular MoS<sub>2</sub> would follow the same growth mode. As a consequence, the observed magnetic anisotropy in Co/MoS<sub>2</sub> (flake) cannot be ascribed simply to an epitaxial growth of Co.



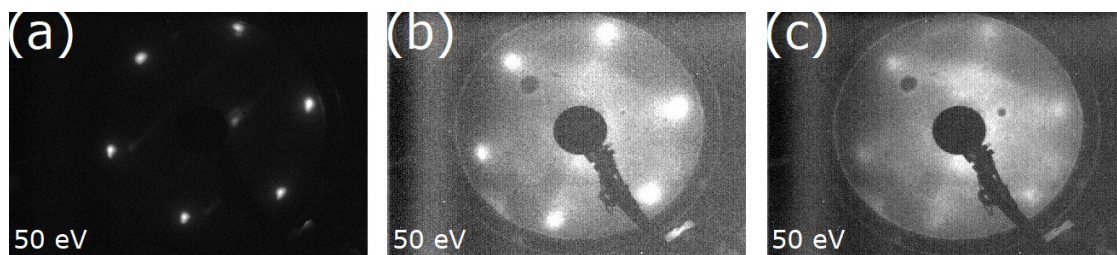

**Figure S7.** LEED patterns of (a) Bare surface of bulk MoS<sub>2</sub> single crystal, (b) Co (3 ML) on bulk MoS<sub>2</sub> and (c) Co (5 ML) on bulk MoS<sub>2</sub>.

### Fe/MoS<sub>2</sub> and Fe/Co/MoS<sub>2</sub>

The charge transfer between Co and MoS<sub>2</sub> was confirmed with XPS, but no charge transfer occurred between Fe and MoS<sub>2</sub> according to Ref. 24,25. For the purpose of comparison, we acquired XMCD images on Fe/MoS<sub>2</sub> (flake) to seek a possible ferromagnetic signature. As shown in Figure S8(a) and (b), we were unable to find a magnetic contrast with Fe (5 ML).

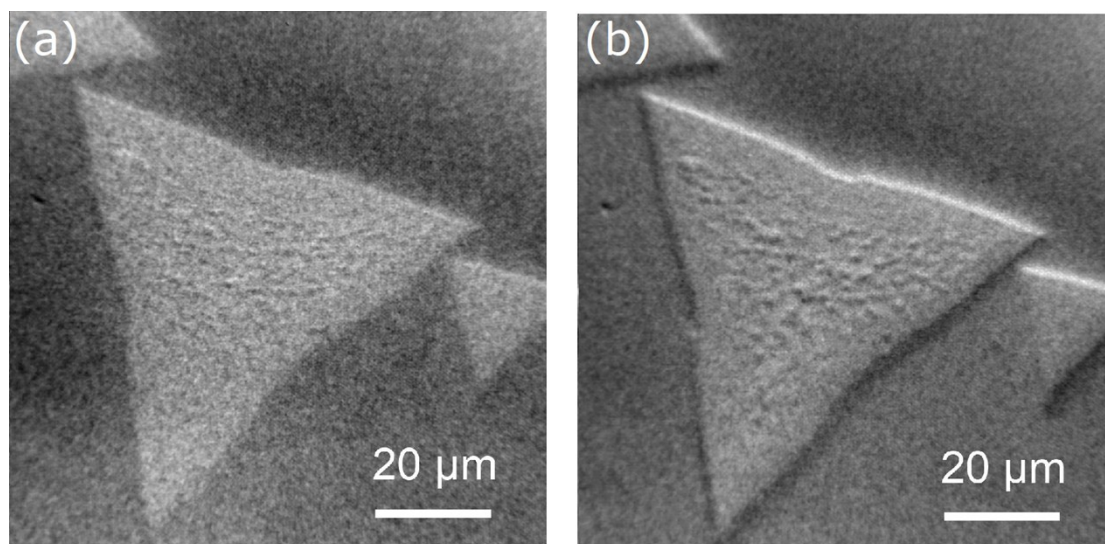

**Figure S8.** XMCD-PEEM images of Fe (5 ML)/MoS<sub>2</sub> acquired using (a) RCP(Fe  $L_3$  – Fe  $L_2$ ) and (b) LCP(Fe  $L_3$  – Fe  $L_2$ ). Neither domain nor contrast reversal is observed.

Interestingly, if Fe is deposited on Co/MoS<sub>2</sub> (flake) of which the ferromagnetic order has been turned on, the Fe film would have its ferromagnetic order actuated even at 3 ML. Figure S9 displays the element-specific domain images. With the

domains in the two images showing a correspondence one to one, there is ferromagnetic coupling between the Co and Fe layers.

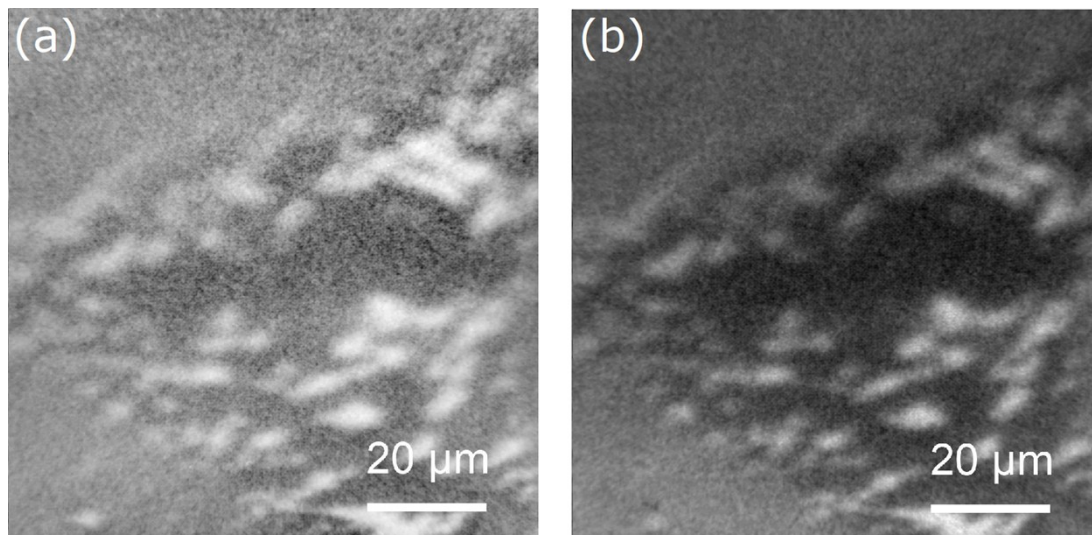

**Figure S9.** XMCD-PEEM images of Fe(3 ML)/Co(9 ML)/MoS<sub>2</sub> acquired using (a) Co L<sub>3</sub> (LCP – RCP) and (b) Fe L<sub>3</sub> (LCP – RCP).

### Absence of XMCD signal in Co/SiO<sub>2</sub>

No magnetic domain was observed when Co stood on the SiO<sub>2</sub> surface. Although it is possible that magnetic domains in Co/SiO<sub>2</sub> were much larger than the PEEM field of view, the nearly overlapped Co L-edge spectra acquired under opposite photon polarization states indicate otherwise. The X-ray absorption spectral (XAS) evidence indicates a lack of ferromagnetic order in Co/SiO<sub>2</sub> near 25 °C.

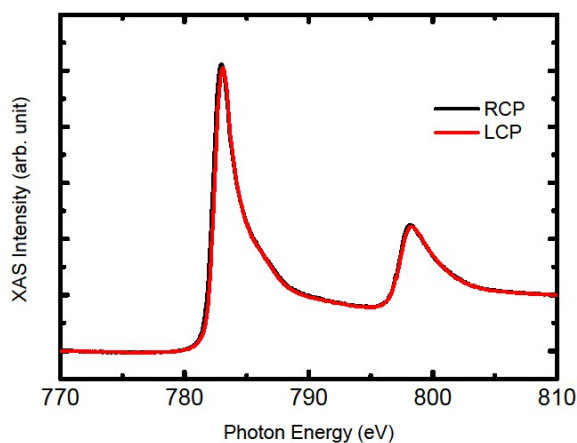



**Figure S10.** XAS of Co (5 ML)/SiO<sub>2</sub>. No asymmetry was observed between the two L-edge resonances upon polarization reversal.

## Uniformity of Co films

The calibration of a Co monolayer (ML) was based on the medium-energy electron-diffraction (MEED) oscillation period recorded during Co deposition on single-crystal Cu(001), as described in the Method section of the main manuscript. To determine the uniformity of the Co film, we deposited Co (1 ML) on MoS<sub>2</sub>/SiO<sub>2</sub> and characterized it using micro-area XAS. Four micro-area spectra were recorded from spots marked in Figure S11(a), respectively. The resemblance of all four spectra, in both intensity and spectral features, indicates that the thickness of the Co film is uniform within our detection limit (sub-monolayer), for both Co/MoS<sub>2</sub> (flake) and Co/SiO<sub>2</sub>.

The AFM (Figure S12) image shows the morphology of Pd(2 nm)/Co (0.6 nm; 3.5 ML)/MoS<sub>2</sub> or SiO<sub>2</sub>. The Pd layer is deposited to prevent the oxidation of Co. The observed film morphology is similar to that found on Fe/MoS<sub>2</sub> (Ref. [24] Figure 3) showing uniformly distributed nanoclusters. These nanoclusters have no obvious correlation to the shape of micrometer-sized magnetic domains.

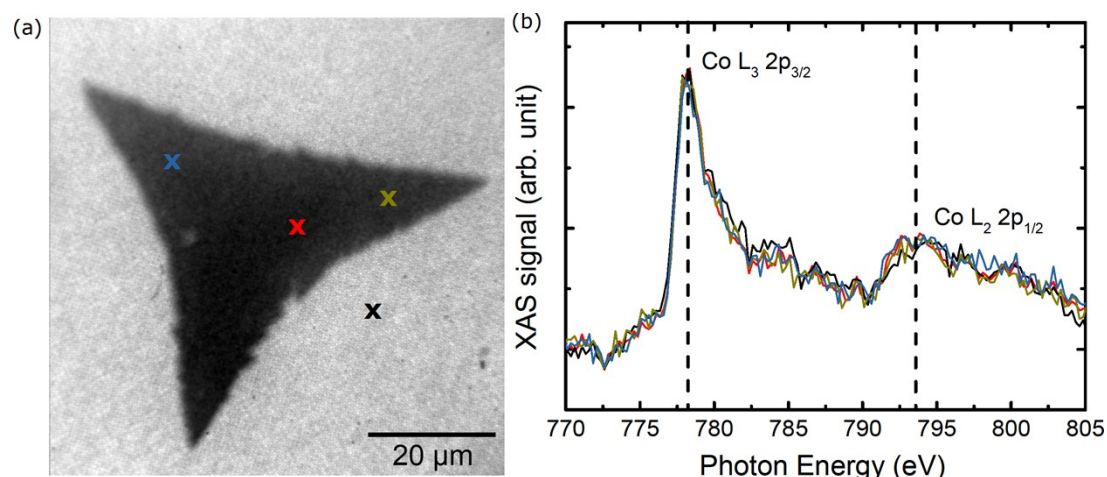

**Figure S11.** PEEM image of Co (1 ML) on MoS<sub>2</sub> and SiO<sub>2</sub>. Each colored “x” sign label in (a) marks the position at which the corresponding Co L-edge spectrum in (b) was recorded. All spectra display a high degree of similarity in their spectral features and intensity.

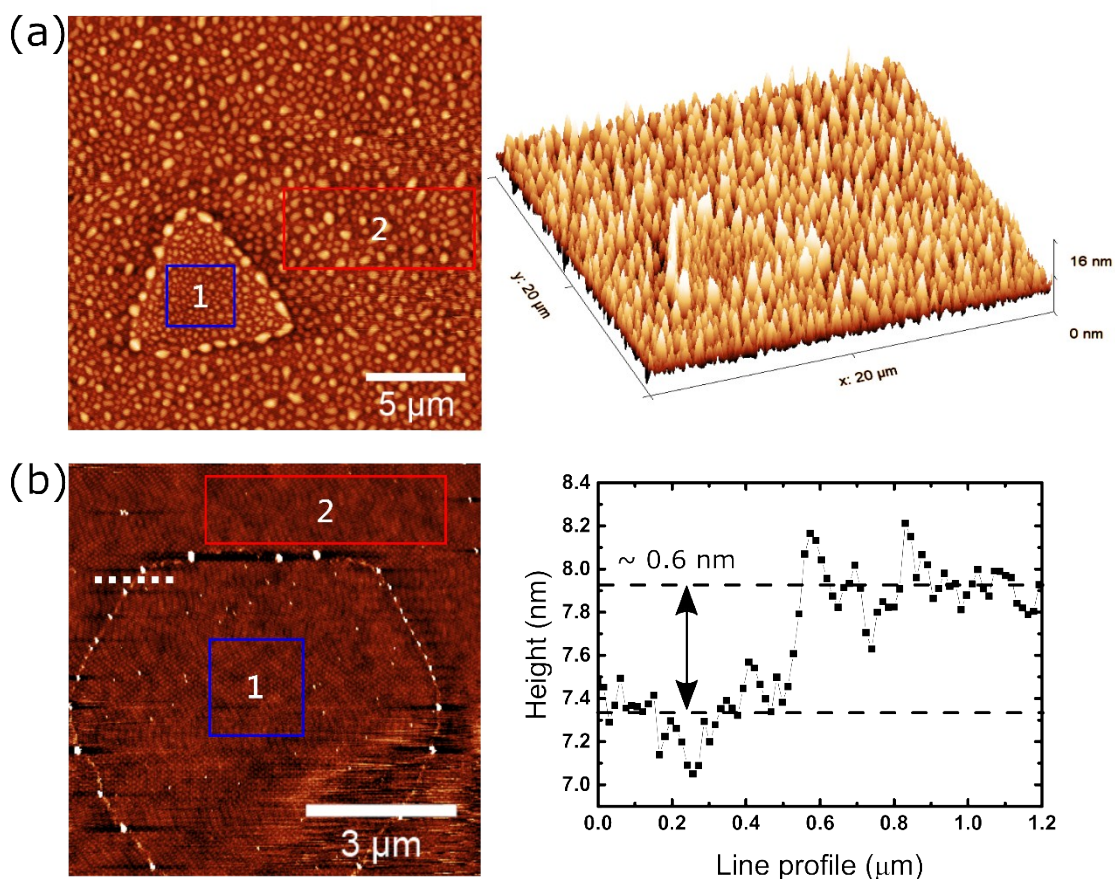

**Figure S12 AFM images.** (a) The AFM morphology of Pd(2 nm)/Co(0.6 nm)/SiO<sub>2</sub> or MoS<sub>2</sub>. The triangular region is the Pd/Co stands on MoS<sub>2</sub>, and the rest is Pd/Co stands on SiO<sub>2</sub>. Region 1(Co/MoS<sub>2</sub>) has a mean roughness of 1.1 nm, and region 2(Co/SiO<sub>2</sub>) has a mean roughness of 1.8 nm. The Pd layer is added to prevent oxidation. (b) The AFM morphology of bare monolayer MoS<sub>2</sub> flake. The mean roughness of region 1(MoS<sub>2</sub>) and region 2(SiO<sub>2</sub>) is 0.4 nm and 0.3 nm, respectively. The 0.6 nm height difference between SiO<sub>2</sub> and MoS<sub>2</sub> flake indicates the flake is monolayer.

### Additional examples of the magnetic anisotropy in Co domains

In the main manuscript, Figure 4 shows that the Co domain boundaries tend to be parallel with the lattice of MoS<sub>2</sub>. Figure S12 offers additional support of our statement in showing more domain boundaries exhibiting a similar behavior.

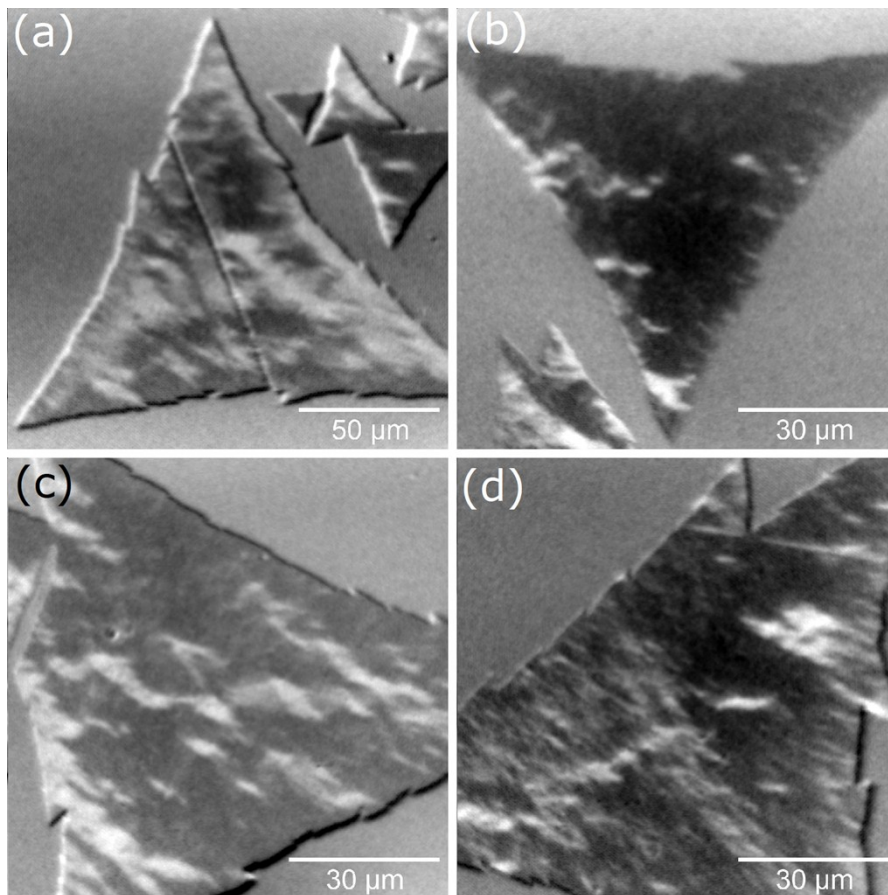

**Figure S13.** Additional examples that show Co domain boundaries having the same tendencies as displayed in Figure 4 of the manuscript. All Co samples presented here had a thickness of 9 ML.

#### References

- S1. Entani, S., Kiguchi, M., Ikeda, S. & Saiki, K. Magnetic properties of ultrathin cobalt films on SiO<sub>2</sub> substrates. *Thin Solid Films* **493**, 221-225 (2005).
- S2. Chen, M., *et al.* TMD FinFET with 4-nm thin body and back gate control for future low-power technology. In: *2015 IEEE International Electron Devices Meeting (IEDM)* (2015).
